# Supplementary material
Source: HighWire-hosted journal article supplement (https://jnm.snmjournals.org/highwire/filestream/108480/field_highwire_adjunct_files/0/262347_Supplemental_Data.pdf)

**Supplemental-Table 1**

| <b>Lesion detection rate</b>         | <b>n (%)</b>    |
|--------------------------------------|-----------------|
| <b>Overall lesion detection rate</b> | 194/245 (79.2%) |
| At PSA < 0.5 ng/mL                   | 27/56 (48.2%)*  |
| At PSA 0.5 to < 1.0 ng/mL            | 26/35 (74.3%)   |
| At PSA 1.0 to < 2.0 ng.mL            | 37/44 (84.0%)   |
| At PSA 2.0 to < 5.0 ng/mL            | 59/61 (96.7%)   |
| At PSA > 5.0 ng/mL                   | 45/49 (91.8%)   |
| <b>For surgical cohort</b>           |                 |
| Overall lesion detection rate        | 148/195 (75.9%) |
| At PSA < 0.5 ng/mL                   | 27/56 (48.2%)   |
| At PSA 0.5 to < 1.0 ng/mL            | 26/33 (78.7%)   |
| At PSA 1.0 to < 2.0 ng.mL            | 32/39 (82.0%)   |
| At PSA 2.0 to < 5.0 ng/mL            | 39/40 (97.5%)   |
| At PSA > 5.0 ng/mL                   | 24/27 (88.9%)   |
| <b>For radiation cohort</b>          |                 |
| Overall lesion detection rate        | 45/50 (90.0%)   |
| At PSA < 0.5 ng/mL                   | N/A             |
| At PSA 0.5 to < 1.0 ng/mL            | 0/2 (0.0%)      |
| At PSA 1.0 to < 2.0 ng.mL            | 5/5 (100%)      |
| At PSA 2.0 to < 5.0 ng/mL            | 20/21 (95.2%)   |
| At PSA > 5.0 ng/mL                   | 21/22 (95.4%)   |
| <b>Cohort at Johns Hopkins</b>       |                 |
| Overall Lesion Detection Rate        | 76/98 (77.5%)   |
| At PSA < 0.5 ng/mL                   | 14/28 (50.0%)   |
| At PSA 0.5 to < 1.0 ng/mL            | 13/16 (81.2%)   |
| At PSA 1.0 to < 2.0 ng.mL            | 17/20 (85.0%)   |
| At PSA 2.0 to < 5.0 ng/mL            | 22/23 (95.6%)   |
| At PSA > 5.0 ng/mL                   | 10/11 (90.9%)   |
| <b>Cohort at NCI</b>                 |                 |
| Overall Lesion Detection Rate        | 118/147 (80.2%) |
| At PSA < 0.5 ng/mL                   | 13/28 (46.4%)   |
| At PSA 0.5 to < 1.0 ng/mL            | 13/19 (68.4%)   |
| At PSA 1.0 to < 2.0 ng.mL            | 20/24 (83.3%)   |
| At PSA 2.0 to < 5.0 ng/mL            | 37/38 (97.4%)   |
| At PSA > 5.0 ng/mL                   | 35/38 (92.1%)   |

\*Lesion detection rate was 37.5% (6/16) for PSA 0.2 to 0.3, 42.3% (11/26) for 0.3 to 0.4 and 71.4% (10/14) for 0.4 to 0.5 ng/mL.

**Supplemental-Table 2:**

| <b>Location of Disease</b>            | <b>n (%)</b>    |
|---------------------------------------|-----------------|
| <b>Overall population (n=245)</b>     |                 |
| Intrapelvic disease                   | 114/245 (46.5%) |
| Extra-pelvic disease                  | 80/245 (32.7%)  |
| Negative scan                         | 51/245 (20.8%)  |
| <b>Cohort at Johns Hopkins (n=98)</b> |                 |
| Intrapelvic disease                   | 38/98 (38.8%)   |
| Extra-pelvic disease                  | 38/98 (38.8%)   |
| Negative scan                         | 22/98 (22.4%)   |
| <b>Surgical Cohort (n=95)</b>         |                 |
| Intrapelvic disease                   | 38/95 (40.0%)   |
| Extra-pelvic disease                  | 35/95 (36.8%)   |
| Negative scan                         | 22/95 (23.1%)   |
| <b>Radiation Cohort (n=3)</b>         |                 |
| Intrapelvic disease                   | 0/3 (0.0%)      |
| Extra-pelvic disease                  | 3/3 (100.0%)    |
| Negative scan                         | 0/3 (0.0%)      |
| <b>Cohort at NCI (n=147)</b>          |                 |
| Intrapelvic disease                   | 76/147 (51.7%)  |
| Extra-pelvic disease                  | 42/147 (28.6%)  |
| Negative scan                         | 29/147 (19.7%)  |
| <b>Surgical Cohort (n=100)</b>        |                 |
| Intrapelvic disease                   | 52/100 (52.0%)  |
| Extra-pelvic disease                  | 23/100 (23.0%)  |
| Negative scan                         | 25/100 (25.0%)  |
| <b>Radiation Cohort (n=47)</b>        |                 |
| Intrapelvic disease                   | 24/47 (51.0%)   |
| Extra-pelvic disease                  | 19/47 (40.4%)   |
| Negative scan                         | 4/47 (8.5%)     |

**Supplemental - Table 3: Patients' characteristics by institution**

|                                       | <b>median ± sdt</b> |
|---------------------------------------|---------------------|
| <b>Overall population (n=245)</b>     |                     |
| PSA                                   | 1.6 ± 4.6 ng/mL     |
| PSAdt                                 | 6.9 ± 11.5 months   |
| Time from prostatectomy to scan       | 5.0 ± 5.1 years     |
| <b>Cohort at Johns Hopkins (n=98)</b> |                     |
| <b>Surgical Cohort (n=95)</b>         |                     |
| PSA                                   | 1.2 ± 2.3 ng/mL     |
| PSAdt                                 | 6.0 ± 4.6 months    |
| Time from prostatectomy to scan       | 4.9 ± 5.6 years     |
| <b>Radiation Cohort (n=3)</b>         |                     |
| PSA                                   | 4.1 ± 0.8 ng/mL     |
| PSAdt                                 | 18 ± 2 months       |
| <b>Cohort at NCI (n=147)</b>          |                     |
| <b>Surgical Cohort (n=100)</b>        |                     |
| PSA                                   | 1.3 ± 3.4 ng/mL     |
| PSAdt                                 | 6.7 ± 10.6 months   |
| Time from prostatectomy to scan       | 5.1 ± 4.6 years     |
| <b>Radiation Cohort (n=47)</b>        |                     |
| PSA                                   | 4.1 ± 7.7 ng/mL     |
| PSAdt                                 | 10.5 ± 14.7 months  |

\*Std: standard deviation.

**Supplemental-Figure 1:** Patient's disease location by PSA (A, C) or PSAdt (B, D) vs. time from prostatectomy or radiation.

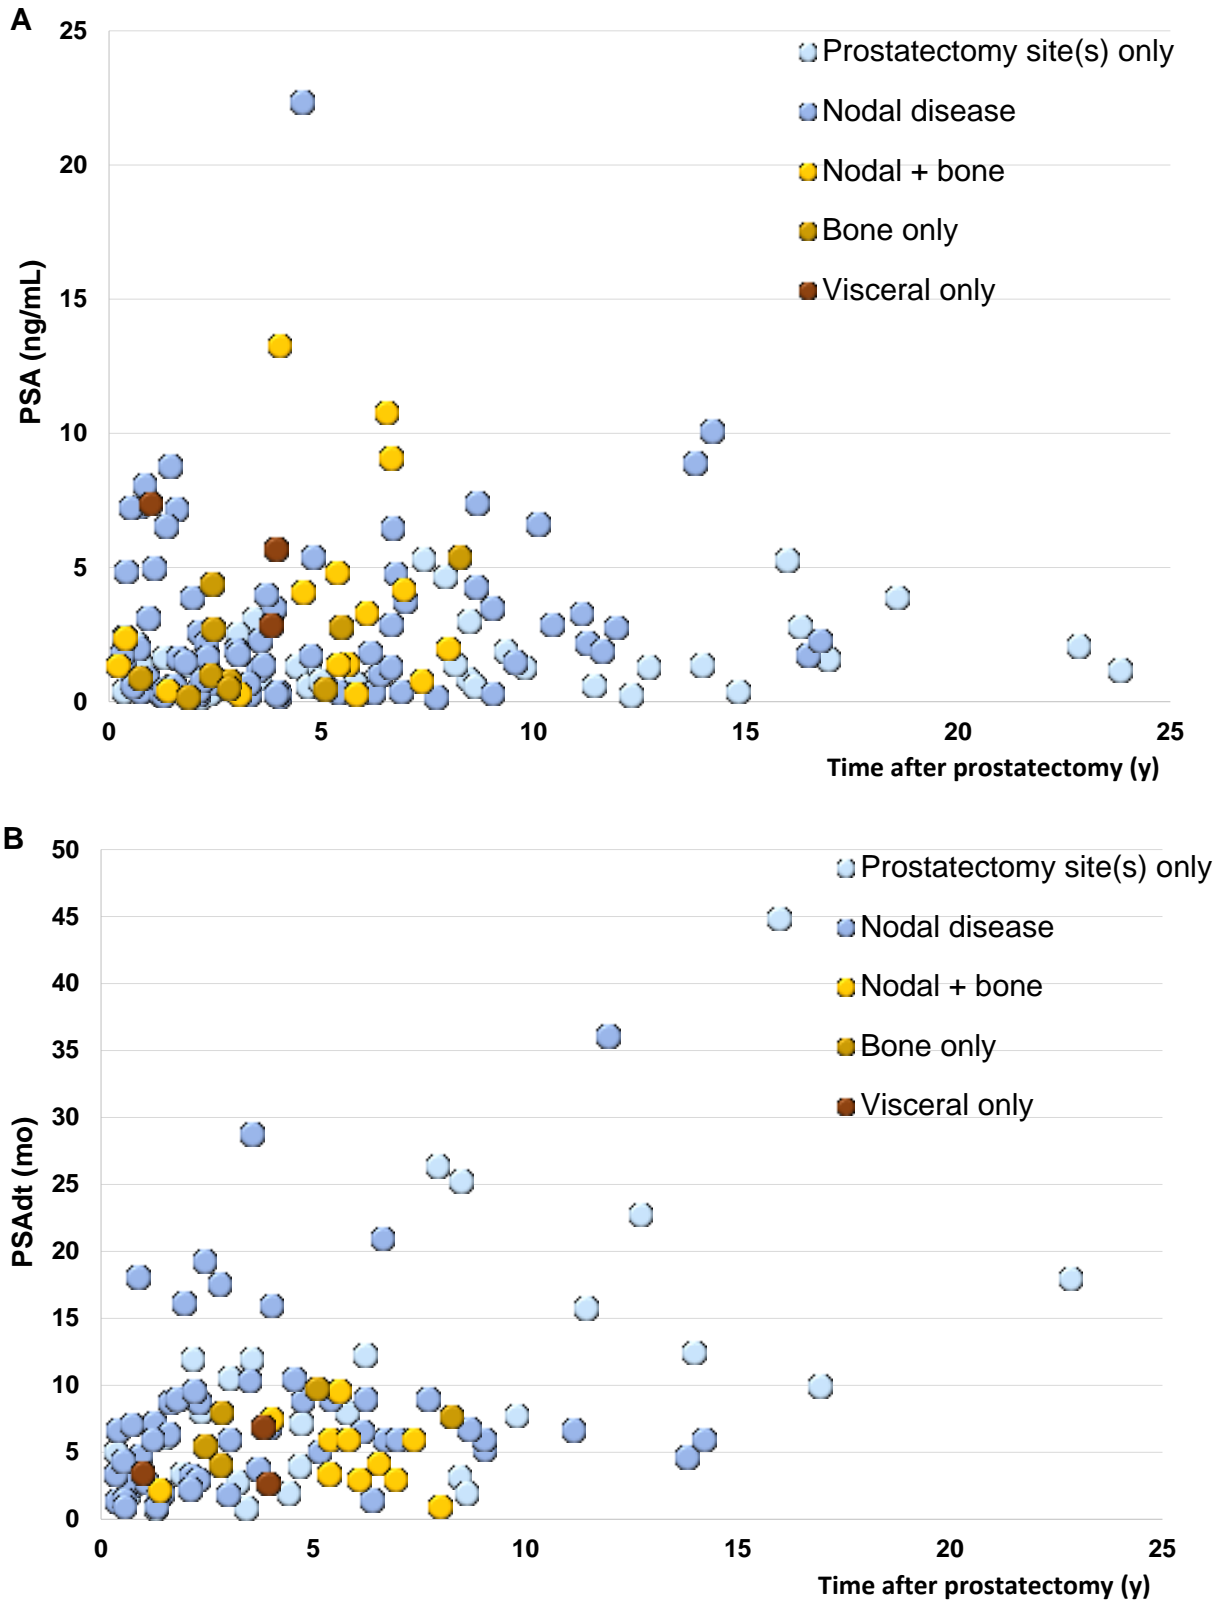

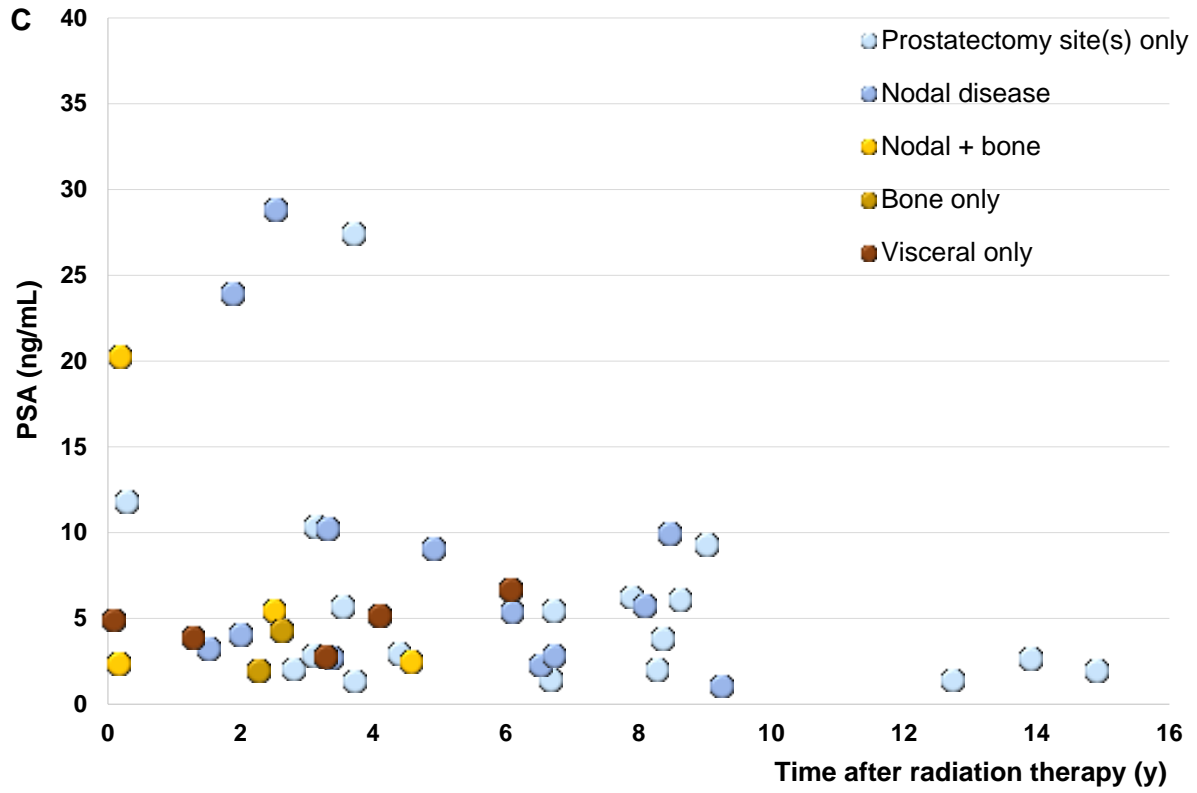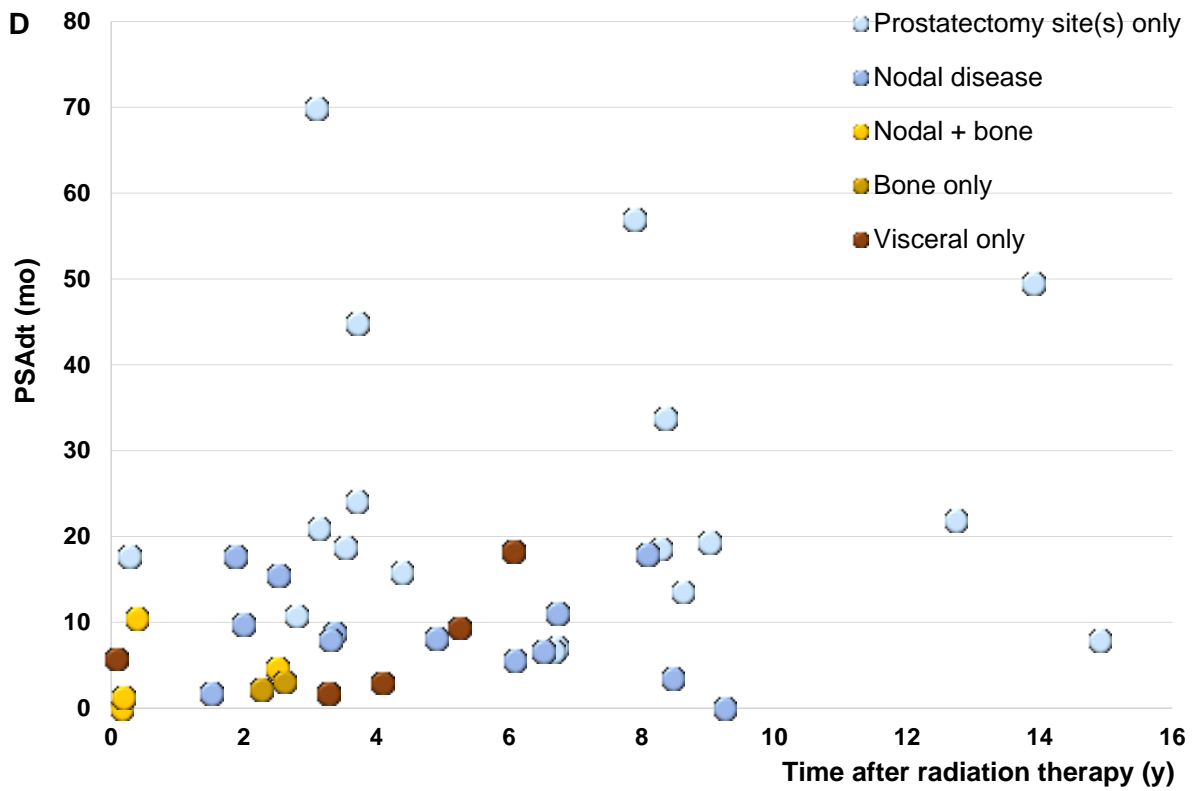

Supplement: 262347_Supplemental_Data.pdf [file 262347_Supplemental_Data.pdf]
